# Supplementary material for: Ferritin measurement IN Donors—Effectiveness of iron Monitoring to diminish iron deficiency and low haemoglobin in whole blood donors (FIND’EM): study protocol for a stepped wedge cluster randomised trial
Source: PubMed Central journal article supplement (PMC7528293; doi:10.1186/s13063-020-04648-w), 2020-10-01
Supplement: 13063_2020_4648_MOESM1_ESM.pdf [file 13063_2020_4648_MOESM1_ESM.pdf]

## Cognitive Failure Questionnaire (CFQ)

Invulinstructie: *De volgende 25 vragen gaan over kleine, alledaagse vergissingen die iedereen van tijd tot tijd maakt. Sommige van die vergissingen overkomen u waarschijnlijk wat vaker dan andere. Hieronder kunt u het cijfer omcirkelen dat hoort bij uw antwoord. Hierbij is 1 voor 'zeer vaak', 2 voor 'vaak', 3 voor 'af en toe', 4 voor 'zelden' en 5 voor 'nooit'.*

|                                                                                                                 |   |   |   |   |   |
|-----------------------------------------------------------------------------------------------------------------|---|---|---|---|---|
| 1. iets lezen en vlak daarna niet meer weten wat u nu gelezen hebt, zodat u het moet overlezen                  | 1 | 2 | 3 | 4 | 5 |
| 2. Vergeten waarom u naar een bepaald gedeelte van uw huis bent gelopen                                         | 1 | 2 | 3 | 4 | 5 |
| 3. Wegwijzers over het hoofd zien                                                                               | 1 | 2 | 3 | 4 | 5 |
| 4. Links en rechts verwarren bij het beschrijven van een route                                                  | 1 | 2 | 3 | 4 | 5 |
| 5. Per ongeluk tegen mensen opbotsen                                                                            | 1 | 2 | 3 | 4 | 5 |
| 6. Niet meer weten of u het licht of het gas hebt uitgedaan, of de deur hebt afgesloten                         | 1 | 2 | 3 | 4 | 5 |
| 7. Niet luisteren naar de naam van een persoon op het moment dat deze persoon zich aan u voorstelt              | 1 | 2 | 3 | 4 | 5 |
| 8. Iets er uitflappen en achteraf bedenken dat dat wel eens beledigend voor iemand zou kunnen zijn              | 1 | 2 | 3 | 4 | 5 |
| 9. Niet merken dat iemand iets tegen u zegt als u met iets anders bezig bent                                    | 1 | 2 | 3 | 4 | 5 |
| 10. Boos worden en daar later spijt van hebben                                                                  | 1 | 2 | 3 | 4 | 5 |
| 11. Belangrijke brieven dagenlang onbeantwoord laten                                                            | 1 | 2 | 3 | 4 | 5 |
| 12. Vergeten welke straat u moet inslaan als u een route kiest die u goed kent, maar die u maar zelden gebruikt | 1 | 2 | 3 | 4 | 5 |
| 13. In een supermarkt niet kunnen vinden wat u zoekt terwijl het er wel is                                      | 1 | 2 | 3 | 4 | 5 |
| 14. U plotseling afvragen of u een woord op de juiste manier gebruikt                                           | 1 | 2 | 3 | 4 | 5 |
| 15. Moeite hebben met het nemen van een beslissing                                                              | 1 | 2 | 3 | 4 | 5 |
| 16. Afspraken vergeten                                                                                          | 1 | 2 | 3 | 4 | 5 |
| 17. Vergeten waar u iets hebt neergelegd, zoals een boek of een krant                                           | 1 | 2 | 3 | 4 | 5 |
| 18. Per ongeluk iets weggooien dat u nodig hebt en bewaren wat u weg wilde gooien                               | 1 | 2 | 3 | 4 | 5 |
| 19. Dagdromen terwijl u eigenlijk naar iets of iemand zou moeten luisteren                                      | 1 | 2 | 3 | 4 | 5 |
| 20. Namen van mensen vergeten                                                                                   | 1 | 2 | 3 | 4 | 5 |
| 21. Beginnen met iets maar het niet afmaken, omdat u ongemerkt met iets anders bent begonnen                    | 1 | 2 | 3 | 4 | 5 |
| 22. Niet op een woord kunnen komen terwijl het 'op het puntje van uw tong' ligt                                 | 1 | 2 | 3 | 4 | 5 |
| 23. In een winkel vergeten wat u kwam kopen                                                                     | 1 | 2 | 3 | 4 | 5 |
| 24. Dingen uit uw handen laten vallen                                                                           | 1 | 2 | 3 | 4 | 5 |
| 25. In een gesprek niets meer weten om over te praten                                                           | 1 | 2 | 3 | 4 | 5 |

Extra vragen (NB: Als u bij alle voorgaande 25 vragen een 5 hebt omcirkeld, dan kunt u onderstaande vragen overslaan)

26. Is het maken van deze alledaagse vergissingen in de afgelopen 5 jaar bij u toegenomen?
- (1) helemaal niet toegenomen
  - (2) een klein beetje toegenomen
  - (3) matig toegenomen
  - (4) nogal sterk toegenomen
  - (5) zeer sterk toegenomen
27. Hoeveel hinder hebt u van het maken van deze vergissingen in het dagelijks leven?
- (1) helemaal geen hinder
  - (2) zeer weinig hinder
  - (3) een beetje hinder
  - (4) veel hinder
  - (5) zeer veel hinder
28. In hoeverre maakt u zich zorgen over het maken van deze vergissingen in het dagelijks leven?
- (1) helemaal geen zorgen
  - (2) zeer weinig zorgen
  - (3) een beetje zorgen
  - (4) veel zorgen
  - (5) zeer veel zorgen
29. Kunt u aangeven in hoeverre u zich ergert aan het maken van deze alledaagse vergissingen?
- (1) het ergert mij helemaal niet
  - (2) het ergert mij een beetje
  - (3) het ergert mij matig
  - (4) het ergert mij nogal veel
  - (5) het ergert mij zeer veel

Subschaal 'Verstrooidheid': vraag 2, 6, 16, 17, 18, 23, 24,

Subschaal 'Verstrooidheid in sociale situaties': vraag 8, 9, 10, 19

Subschaal 'Namen en Woorden': vraag 7, 20, 22

Subschaal 'Oriëntatie': vraag 3, 4, 12
